# Supplementary material for: Epidemiological updates of post-traumatic related limb osteomyelitis in china: a 10 years multicentre cohort study
Source: PubMed Central journal article supplement — Int J Surg. 2023 May 26;109(9):2721–31. doi: 10.1097/JS9.0000000000000502 (PMC10498838; doi:10.1097/js9.0000000000000502), 2023-05-26
Supplement: js9-109-2721-s002.pdf [file js9-109-2721-s002.pdf]

## **Supplemental Materials**

**Supplementary 1 Text: The details list of participation Hospitals and the region they represented in China.**

| Region of China | Hospital                                                          |
|-----------------|-------------------------------------------------------------------|
| Southwest       | Second Affiliated Hospital of Chongqing Medical University        |
|                 | First Affiliated Hospital of Army Medical University              |
|                 | First Affiliated Hospital of Chongqing Medical University         |
|                 | Guizhou Provincial People's Hospital                              |
|                 | West China Hospital of Sichuan University                         |
|                 | First Affiliated Hospital of Zunyi Medical University             |
| Northwest       | First Hospital of Xinjiang Medical University                     |
|                 | Lanzhou General Hospital of People's Liberation Army              |
|                 | Tangdu Hospital, Fourth Military Medical University               |
| Northeast       | First Affiliated Hospital of Harbin Medical University            |
|                 | First Affiliated Hospital of Dalian Medical University            |
| North           | Peking University Jishuitan Hospital                              |
|                 | Tianjin Medical University General Hospital                       |
|                 | Third Hospital of Hebei Medical University                        |
| Easten          | Shanghai Jiao Tong University Affiliated Sixth People's Hospital  |
|                 | Nanjing Drum Tower Hospital of Nanjing University Medical School  |
|                 | First Affiliated Hospital of Nanjing Medical University           |
|                 | Zhejiang Provincial People's Hospital of Hangzhou Medical College |
| Central         | Second Xiangya Hospital, Central South University                 |
|                 | Wuhan General Hospital of People's Liberation Army                |
| South           | Nanfang Hospital of Southern Medical University                   |

## **Supplementary 2 Text: Inclusion and exclusion criteria**

### **Inclusion criteria**

- A. Post-traumatic osteomyelitis was definitely diagnosed by surgeons
- B. All ages
- C. Traumatic fractures of limbs (humerus, ulnar and radius, clavicle, femur, tibia and fibula, patella, calcaneus, talus)
- D. Complete clinical data records;
- E. Complete sampling and surgical procedure records
- F. Complete imagological, surgical or histopathological data
- G. Bacterial culture and drug sensitivity test to confirm infection;
- H. Approved by Ethics Review Committee

### **Exclusion criteria**

- A. Post-traumatic osteomyelitis could not be diagnosed definitely
- B. There is clear clinical evidence of infection, but without positive result of laboratory bacterial culture
- C. Without the results of drug sensitivity
- D. Don't approved by Ethics Review Committee

**Supplemental Table 1. Testing Bacteria Library List.**

| Gram Positive bacteria                           | Gram Negative bacteria                                             |                                                     |
|--------------------------------------------------|--------------------------------------------------------------------|-----------------------------------------------------|
| MSSA                                             | <i>Pseudomonas aeruginosa</i>                                      | <i>Haemophilus haemolyticus</i>                     |
| MRSA                                             | <i>Enterobacter cloacae</i>                                        | <i>Enterobacter asburiae</i>                        |
| <i>Enterococcus faecalis</i>                     | <i>Escherichia coli</i>                                            | <i>Aeromonas salmonicida</i>                        |
| <i>Staphylococcus epidermidis</i>                | <i>Acinetobacter baumannii</i>                                     | <i>Burkholderia cepacia</i>                         |
| <i>S. haemolyticus</i>                           | <i>Klebsiella pneumoniae</i>                                       | <i>Leclercia adecarboxylata</i>                     |
| <i>Enterococcus faecium</i>                      | <i>Serratia marcescens</i>                                         | <i>Enterobacterium intermediates</i>                |
| Gram-positive bacillus                           | <i>Proteus mirabilis</i>                                           | <i>Serratia odorifera</i>                           |
| <i>Staphylococcus simulans</i>                   | <i>proteusbacillus vulgaris</i>                                    | <i>Enterobacter amnigenus type 2</i>                |
| <i>Enterococcus avium</i>                        | <i>Stenotrophomonas maltophilia</i>                                | <i>Achromobacter denitrificans</i>                  |
| coagulase negative staphylococcus                | <i>Aeromonas hydrophila</i>                                        | <i>Achromobacter sp</i>                             |
| <i>Streptococcus haemolyticus</i>                | <i>Klebsiella oxytoca</i>                                          | <i>Cedecea lapagei</i>                              |
| <i>S. capitis</i>                                | <i>Enterobacter aerogenes</i>                                      | <i>Myroides odoratimimus</i>                        |
| <i>S. lugdunensis</i>                            | <i>Aeromonas sobria</i>                                            | <i>Cupriavidus</i>                                  |
| <i>Streptococcus pyogenes</i>                    | <i>Acinetobacter baumannii-Acinetobacter calcoaceticus complex</i> | <i>Providencia stuartii</i>                         |
| <i>Staphylococcus warneri</i>                    | <i>pseudomonas putida</i>                                          | <i>Vibrio fluvialis</i>                             |
| <i>Enterococcus Gallinarum</i>                   | <i>Proteus vulgaris</i>                                            | <i>Hafnia alvei</i>                                 |
| <i>Enterococcus casseliflavus</i>                | <i>Citrobacter freundii</i>                                        | carbapenem-resistant <i>Acinetobacter baumannii</i> |
| <i>Streptococcus agalactiae</i>                  | <i>Morganella morganii</i>                                         | <i>Doblin salmonella</i>                            |
| <i>Staphylococcus cohnii</i>                     | <i>Enterobacter carcinoma</i>                                      | <i>Moraxella osloensis</i>                          |
| <i>Micrococcus luteus</i>                        | <i>Acinetobacter lwoffii</i>                                       | <i>Enterobacter hormaechei</i>                      |
| <i>Streptococcus mitis</i>                       | Fluorescence/foul-smelling <i>pseudomonas</i>                      | <i>Cedecea davisae</i>                              |
| <i>Bacillus cereus</i>                           | <i>Flavobacterium indologenes</i>                                  | <i>Aeromonas caviae</i>                             |
| <i>Streptococcus pneumoniae</i>                  | <i>Acinetobacter junii</i>                                         | <i>Flavobacterium odoratum</i>                      |
| <i>S. saprophyticus</i>                          | <i>Serratia marcescens subspecies</i>                              | <i>Raoultella planticola</i>                        |
| <i>Streptococcus anginosus</i>                   | <i>Klebsiella pneumoniae subspecies</i>                            | <i>Serratia fonticola</i>                           |
| <i>staphylococcus xylosus</i>                    | <i>Xylose oxidizes noncolorific bacillus</i>                       | <i>Acinetobacter calcoaceticus</i>                  |
| <i>S. hominis</i>                                | <i>Citrobacter braakii</i>                                         | <i>Ochrobactrum anthropi</i>                        |
| <i>Staphylococcus lugdunensis</i>                | <i>Acinetobacter haemolyticus</i>                                  | <i>Serratia plymuthica</i>                          |
| <i>Enterococcus casseliflavus/gslinarum</i>      | <i>Baumann/calcium acetate acinetobacter complex</i>               | <i>Alcaligenes xylosoxidans subsp xylosoxidans</i>  |
| <i>Kocuria kristinae</i>                         | <i>Pseudomonas stutzeri</i>                                        | <u><i>Alcaligenes xylosoxidans</i></u>              |
| <i>Streptococcus dysgalactiae</i>                | <i>Morganella morganii</i>                                         | <b>Total=96</b>                                     |
| Group d streptococcus                            | <i>Prpteus penneri</i>                                             |                                                     |
| <i>Streptococcus constellatus</i>                | <i>Enterobacter agglomerans</i>                                    |                                                     |
| <i>S. auricularis</i>                            | <i>Lycidine klebsiella</i>                                         |                                                     |
| <i>Staphylococcus chromogenes</i>                | <i>Proteus penneri</i>                                             |                                                     |
| <i>Enterococcus hirae</i>                        | <i>Alcaligenes faecalis</i>                                        |                                                     |
| <i>Streptococcus epiphyllis</i>                  | <i>Pasteurella multocida</i>                                       |                                                     |
| <i>Staphylococcus schleiferi</i>                 | <i>Citrobacter farmeri</i>                                         |                                                     |
| <i>Enterococcus durans</i>                       | <i>Klebsiella plantica</i>                                         |                                                     |
| <i>Staphylococcus squirrel</i>                   | <i>Baumann/acinetobacter haemolyticus</i>                          |                                                     |
| <i>S. cystobacteria</i>                          | <i>Sphingomonas paucimobilis</i>                                   |                                                     |
| <i>Staphylococcus kloosii</i>                    | <i>Serratia rubidaea</i>                                           |                                                     |
| <i>Staphylococcus intermedius/Staphylococcus</i> | <i>Serratia liquefaciens</i>                                       |                                                     |
| <i>Granulicatella para-adiacens</i>              | <i>Flavobacterium breve</i>                                        |                                                     |
| <i>Dermacoccus nishinomiyaensis</i>              | <i>Providencia rettgeri</i>                                        |                                                     |
| <i>Aerococcus viridans</i>                       | <i>Providencia stuartii</i>                                        |                                                     |
| <i>Enterococcus raffinosus</i>                   | <i>Brac citrobacter</i>                                            |                                                     |
| <i>Erysipelothrix rhusiopathiae</i>              | <i>Achromobacter xylosoxidans</i>                                  |                                                     |
| <i>Staphylococcus hominis</i>                    | <i>Non-decarboxylleucella</i>                                      |                                                     |
| <i>Staphylococcus arlettae</i>                   | <i>Pseudomonas</i>                                                 |                                                     |
| <i>Streptococcus tolhutte</i>                    | <i>Cozer's bacillus citrate</i>                                    |                                                     |
| <i>Corynebacterium striatum</i>                  | <i>Malonate negative citrate bacillus</i>                          |                                                     |
| <i>Streptococcus</i>                             | <i>sagenopsis</i>                                                  |                                                     |
| <i>Staphylococcus hyicus</i>                     | <i>Pseudomonas alcaligenes</i>                                     |                                                     |
| <i>Streptococcus acidominimus</i>                | <i>Ralstonia pickettii</i>                                         |                                                     |
| <i>Staphylococcus lentus</i>                     | <i>Aeromonas</i>                                                   |                                                     |
| <i>Enterococcus casseliflavus</i>                | <i>Alcaligenes faecalis ssp faecalis</i>                           |                                                     |
| <i>Bacillus subtilis</i>                         | <i>Paratyphoid C</i>                                               |                                                     |
| <i>Streptococcus milleri</i>                     | <i>Myroides</i>                                                    |                                                     |
| <i>Micrococcus antarcticus/Micrococcus lute</i>  | <i>Citrobacter koseri</i>                                          |                                                     |
| <i>Rhodococcus equi</i>                          | <i>Haemophilus parainfluenzae</i>                                  |                                                     |
| <i>Staphylococcus caprae</i>                     | <i>Myroides odoratus</i>                                           |                                                     |
| <i>Bacillus thuringiensis</i>                    | <i>Gram-negative bacilli</i>                                       |                                                     |
| <i>Corynebacterium jack</i>                      | <i>Pseudomonas shi (stutzer)</i>                                   |                                                     |
| <u><i>Enterococcus</i></u>                       | <i>Cronobacter sakazakii</i>                                       |                                                     |
| <b>Total=65</b>                                  |                                                                    |                                                     |



**Supplemental Table 3.** Univariate analysis of logistic regression was conducted to identify relative risk factors for patients who had monomicrobial positive (MP) or monomicrobial negative (MN) infection.

|                                      |     | MP           | MN           | Odds Ratio<br>(%95 CI)  | P vaule |
|--------------------------------------|-----|--------------|--------------|-------------------------|---------|
|                                      |     | N=1427       | N=1485       |                         |         |
| <b>1-Ethnicity</b>                   |     |              |              |                         |         |
| The Han ethnicity                    |     | 1315 (92.15) | 1393 (93.8)  | Reference               |         |
| The Hui ethnicity                    |     | 24 (1.68)    | 13 (0.88)    | 0.511 (0.259 to 1.008)  | 0.0529  |
| Tujia                                |     | 17 (1.19)    | 59 (3.97)    | 1.111 (0.579 to 2.129)  | 0.7521  |
| Other minorities                     |     | 71 (4.98)    | 20 (1.35)    | 0.784 (0.551 to 1.117)  | 0.1782  |
| <b>2-Gender</b>                      |     |              |              |                         |         |
| Male                                 |     | 1155 (80.94) | 1158 (77.98) | Reference               |         |
| Female                               |     | 272 (19.06)  | 327 (22.02)  | 1.199 (1.001 to 1.436)  | 0.0484  |
| <b>3-Injury factors</b>              |     |              |              |                         |         |
| Traffic accident                     |     | 435 (30.48)  | 605 (40.79)  | Reference               |         |
| Fall                                 |     | 310 (21.72)  | 310 (21.72)  | 0.475 (0.383 to 0.59)   | <0.0001 |
| High falling injury                  |     | 159 (11.14)  | 21 (9.76)    | 0.656 (0.507 to 0.847)  | 0.0013  |
| Hard object crashing                 |     | 88 (6.17)    | 133 (8.96)   | 1.087 (0.808 to 1.461)  | 0.5822  |
| Crush injury                         |     | 44 (3.08)    | 50 (3.37)    | 0.817 (0.535 to 1.248)  | 0.3497  |
| Destructive injury                   |     | 25 (1.75)    | 51 (3.43)    | 1.467 (0.895 to 2.404)  | 0.1287  |
| Mangled injury                       |     | 27 (1.89)    | 44 (2.96)    | 1.172 (0.714 to 1.922)  | 0.5301  |
| Cutting injury                       |     | 12 (0.28)    | 24 (1.62)    | 1.438 (0.711 to 2.907)  | 0.3117  |
| High-explosive injury                |     | 9 (0.63)     | 10 (0.67)    | 0.799 (0.322 to 1.983)  | 0.6283  |
| Pathological fracture                |     | 5 (0.35)     | 8 (0.54)     | 1.15 (0.374 to 3.54)    | 0.8070  |
| Osocomial damage                     |     | 1 (0.07)     | 0 (0)        | 0.185 (0.001 to 23.869) | 0.4962  |
| Ambiguous trauma                     |     | 312 (21.86)  | 210 (14.14)  | 0.484 (0.391 to 0.599)  | <0.0001 |
| <b>4-Age</b>                         |     |              |              |                         |         |
| ≤ 20 yr                              |     | 143 (10.02)  | 128 (8.62)   | Reference               |         |
| 21-30 yr                             |     | 210 (14.72)  | 223 (15.02)  | 1.186 (0.875 to 1.608)  | 0.2707  |
| 31-40 yr                             |     | 250 (17.52)  | 275 (18.52)  | 1.229 (0.916 to 1.648)  | 0.1691  |
| 41-50 yr                             |     | 386 (27.05)  | 405 (27.27)  | 1.172 (0.889 to 1.545)  | 0.2599  |
| 51-60 yr                             |     | 262 (18.36)  | 248 (16.7)   | 1.057 (0.787 to 1.42)   | 0.7107  |
| ≥ 61 yr                              |     | 176 (12.33)  | 206 (13.87)  | 1.307 (0.957 to 1.786)  | 0.0924  |
| <b>5-Source of patients</b>          |     |              |              |                         |         |
| Primary admitted w/o surgery         |     | 238 (16.68)  | 294 (19.8)   | Reference               |         |
| Transferred w/o postoperative        |     | 408 (28.59)  | 633 (42.63)  | 1.256 (1.017 to 1.552)  | 0.0346  |
| Transferred postoperative            |     | 586 (41.07)  | 420 (28.28)  | 0.58 (0.469 to 0.717)   | <0.0001 |
| Return to follow-up postoperative    |     | 195 (13.67)  | 138 (9.29)   | 0.573 (0.434 to 0.756)  | <0.0001 |
| <b>6-Injury types</b>                |     |              |              |                         |         |
| Closed                               |     | 422 (29.57)  | 280 (18.86)  | Reference               |         |
| Opened                               |     | 795 (55.71)  | 1073 (72.46) | 2.04 (1.709 to 2.434)   | <0.0001 |
| Ambiguous                            |     | 210 (14.72)  | 129 (8.69)   | 0.926 (0.709 to 1.208)  | 0.5705  |
| <b>7-Complications/Comorbidities</b> |     |              |              |                         |         |
| Anemia                               | NA  | 1357 (95.09) | 1384 (93.2)  | Reference               |         |
|                                      | YES | 70 (4.91)    | 101 (6.8)    | 1.415 (1.034 to 1.936)  | 0.0303  |
| Diabetes                             | NA  | 1358 (95.16) | 1405 (94.61) | Reference               |         |
|                                      | YES | 69 (4.84)    | 80 (5.39)    | 1.12 (0.805 to 1.559)   | 0.5003  |
| Hypertension                         | NA  | 1360 (95.3)  | 1411 (95.02) | Reference               |         |
|                                      | YES | 67 (4.7)     | 74 (4.98)    | 1.065 (0.759 to 1.494)  | 0.7177  |
| Hypoproteinemia                      | NA  | 1365 (95.66) | 1404 (94.55) | Reference               |         |
|                                      | YES | 62 (4.34)    | 81 (5.45)    | 1.27 (0.905 to 1.783)   | 0.1668  |
| Multiple fracture                    | NA  | 1231 (86.26) | 1156 (77.85) | Reference               |         |
|                                      | YES | 196 (13.74)  | 329 (22.15)  | 1.787 (1.472 to 2.171)  | <0.0001 |
| Nerve injury                         | NA  | 1355 (94.95) | 1373 (92.46) | Reference               |         |
|                                      | YES | 72 (5.05)    | 112 (7.54)   | 1.535 (1.131 to 2.084)  | 0.0059  |
| Shock                                | NA  | 1386 (97.13) | 1370 (92.26) | Reference               |         |
|                                      | YES | 41 (2.87)    | 115 (7.74)   | 2.838 (1.971 to 4.082)  | <0.0001 |
| Skin abrasions                       | NA  | 1368 (95.87) | 1362 (91.72) | Reference               |         |
|                                      | YES | 59 (4.13)    | 123 (8.28)   | 2.094 (1.521 to 2.881)  | <0.0001 |
| Vascular injury                      | NA  | 1325 (92.85) | 1313 (88.42) | Reference               |         |
|                                      | YES | 102 (7.15)   | 172 (11.58)  | 1.702 (1.317 to 2.199)  | <0.0001 |
| Others                               | NA  | 1328 (93.06) | 1394 (93.87) | Reference               |         |
|                                      | YES | 99 (6.94)    | 91 (6.13)    | 0.876 (0.652 to 1.175)  | 0.3768  |
| None                                 | NA  | 541 (37.91)  | 770 (51.85)  | Reference               |         |
|                                      | YES | 886 (62.09)  | 715 (48.15)  | 0.567 (0.489 to 0.657)  | <0.0001 |

**Supplemental Table 4.** Multivariate analysis of logistic regression was performed to identify the relative risk factors for patients with monomicrobial positive (MP) or monomicrobial negative (MN) infections.

|                                    | Odds Ratio<br>(%95 CI) | P vaule |
|------------------------------------|------------------------|---------|
| <b>Ethnicity</b>                   |                        |         |
| The Han ethnicity                  | Reference              |         |
| The Hui ethnicity                  | 0.453 (0.225 to 0.913) | 0.0269  |
| Tujia                              | 1.445 (0.736 to 2.838) | 0.2847  |
| Other minorities                   | 0.915 (0.63 to 1.328)  | 0.6403  |
| <b>Gender</b>                      |                        |         |
| Male                               | Reference              |         |
| Female                             | 1.255 (1.037 to 1.517) | 0.0195  |
| <b>Injury factors</b>              |                        |         |
| Traffic accident                   | Reference              |         |
| Fall                               | 0.676 (0.536 to 0.852) | 0.0009  |
| High falling injury                | 1.177 (0.868 to 1.597) | 0.2938  |
| Hard object crashing               | 0.79 (0.605 to 1.032)  | 0.0834  |
| Crush injury                       | 0.719 (0.466 to 1.109) | 0.1358  |
| Destructive injury                 | 1.106 (0.665 to 1.839) | 0.6973  |
| Mangled injury                     | 1.126 (0.678 to 1.87)  | 0.6462  |
| Cutting injury                     | 1.343 (0.653 to 2.761) | 0.4226  |
| High-explosive injury              | 0.673 (0.267 to 1.694) | 0.4007  |
| Pathological fracture              | 1.532 (0.484 to 4.854) | 0.4684  |
| Ambiguous trauma                   | 0.645 (0.513 to 0.81)  | 0.0002  |
| <b>Source of patients</b>          |                        |         |
| Primary admitted w/o surgery       | Reference              |         |
| Transferred w/o postoperative      | 1.183 (0.949 to 1.475) | 0.1351  |
| Transferred postoperative          | 0.654 (0.52 to 0.823)  | 0.0003  |
| Return to follow-up postoperative  | 0.683 (0.511 to 0.913) | 0.0102  |
| <b>Injury types</b>                |                        |         |
| Closed                             | Reference              |         |
| Opened                             | 1.783 (1.47 to 2.162)  | <0.0001 |
| Ambiguous                          | 1.298 (0.972 to 1.732) | 0.0766  |
| <b>Complications/Comorbidities</b> |                        |         |
| Shock                              | NA                     |         |
| YES                                | 1.526 (1.036 to 2.246) | 0.0322  |
| None                               | NA                     |         |
| YES                                | 0.748 (0.636 to 0.881) | 0.0005  |

MP (N=1427)      MN (N=1485)

**Supplemental Table 5.** Univariate analysis of logistic regression was conducted to identify relative risk factors for patients with polymicrobial positive (PP) or polymicrobial negative (PN) infections.

|                                      | PP<br>N=46 | PN<br>N=266 | Odds Ratio<br>(%95 CI)  | P value   |
|--------------------------------------|------------|-------------|-------------------------|-----------|
| <b>1-Ethnicity</b>                   |            |             |                         |           |
| The Han ethnicity                    | 42 (91.3)  | 251 (94.36) | Reference               |           |
| The Hui ethnicity                    | 0 (0)      | 3 (1.13)    | 0.643 (0.096 to +∞)     | 1         |
| Tujia                                | 3 (6.52)   | 2 (0.75)    | 0.112 (0.018 to 0.688)  | 0.0181    |
| Other minorities                     | 1 (2.17)   | 10 (3.76)   | 1.673 (0.209 to 13.413) | 0.6278    |
| <b>2-Gender</b>                      |            |             |                         |           |
| Male                                 | 40 (86.96) | 208 (78.2)  | Reference               |           |
| Female                               | 6 (13.04)  | 58 (21.8)   | 1.859 (0.751 to 4.6)    | 0.1799    |
| <b>3-Injury factors</b>              |            |             |                         |           |
| Traffic accident                     | 16 (34.78) | 119 (44.74) | Reference               |           |
| Fall                                 | 9 (19.57)  | 23 (8.65)   | 0.322 (0.126 to 0.824)  | 0.0181    |
| High falling injury                  | 5 (10.87)  | 32 (12.03)  | 0.807 (0.273 to 2.387)  | 0.6980    |
| Hard object crashing                 | 3 (6.52)   | 21 (7.89)   | 0.957 (0.256 to 3.575)  | 0.9482    |
| Crush injury                         | 0 (0)      | 8 (3.01)    | 2.388 (0.111 to 51.385) | 0.5784    |
| Destructive injury                   | 1 (2.17)   | 11 (4.14)   | 1.387 (0.167 to 11.51)  | 0.9374    |
| Mangled injury                       | 0 (0)      | 11 (4.14)   | 3.23 (0.16 to 65.024)   | 0.4440    |
| Cutting injury                       | 0 (0)      | 4 (1.5)     | 1.264 (0.046 to 34.521) | 0.8896    |
| High-explosive injury                | 0 (0)      | 3 (1.13)    | 0.983 (0.031 to 31.294) | 0.9923    |
| Ambiguous trauma                     | 12 (26.09) | 34 (12.78)  | 0.387 (0.167 to 0.898)  | 0.0270    |
| <b>4-Age</b>                         |            |             |                         |           |
| ≤ 20 yr                              | 4 (8.7)    | 33 (12.41)  | Reference               |           |
| 21-30 yr                             | 10 (21.74) | 40 (15.04)  | 0.485 (0.139 to 1.689)  | 0.2555    |
| 31-40 yr                             | 6 (13.04)  | 33 (12.41)  | 0.667 (0.172 to 2.582)  | 0.5573    |
| 41-50 yr                             | 13 (28.26) | 89 (33.46)  | 0.83 (0.253 to 2.727)   | 0.7586    |
| 51-60 yr                             | 9 (19.57)  | 40 (15.04)  | 0.539 (0.152 to 1.908)  | 0.3378    |
| ≥ 61 yr                              | 4 (8.7)    | 31 (11.65)  | 0.939 (0.216 to 4.086)  | 0.9336    |
| <b>5-Source of patients</b>          |            |             |                         |           |
| Primary admitted w/o surgery         | 5 (10.87)  | 32 (12.03)  | Reference               |           |
| Transferred w/o postoperative        | 8 (17.39)  | 130 (48.87) | 2.539 (0.778 to 8.283)  | 0.1225    |
| Transferred postoperative            | 31 (67.39) | 96 (36.09)  | 0.484 (0.173 to 1.35)   | 0.1654    |
| Return to follow-up postoperative    | 2 (4.35)   | 8 (3.01)    | 0.625 (0.102 to 3.833)  | 0.6115    |
| <b>6-Injury types</b>                |            |             |                         |           |
| Closed                               | 4 (8.7)    | 24 (9.02)   | Reference               |           |
| Opened                               | 38 (82.61) | 232 (87.22) | 1.018 (0.334 to 3.096)  | 0.9756    |
| Ambiguous                            | 4 (8.7)    | 10 (3.76)   | 0.417 (0.087 to 2.003)  | 0.2744    |
| <b>7-Complications/Comorbidities</b> |            |             |                         |           |
| Anemia                               | NA         | 45 (97.83)  | 244 (91.73)             | Reference |
| YES                                  | 1 (2.17)   | 22 (8.27)   | 2 (0.454 to 8.81)       | 0.3596    |
| Diabetes                             | NA         | 45 (97.83)  | 261 (98.12)             | Reference |
| YES                                  | 1 (2.17)   | 5 (1.88)    | 0.862 (0.098 to 7.552)  | 0.8934    |
| Hypertension                         | NA         | 46 (100)    | 256 (96.24)             | Reference |
| YES                                  | 0 (0)      | 10 (3.76)   | 2.494 (0.501 to +∞)     | 0.391     |
| Hypoproteinemia                      | NA         | 43 (93.48)  | 227 (85.34)             | Reference |
| YES                                  | 3 (6.52)   | 39 (14.66)  | 2.462 (0.728 to 8.329)  | 0.1473    |
| Multiple fracture                    | NA         | 38 (82.61)  | 175 (65.79)             | Reference |
| YES                                  | 8 (17.39)  | 91 (34.21)  | 2.47 (1.106 to 5.516)   | 0.0274    |
| Nerve injury                         | NA         | 42 (91.3)   | 233 (87.59)             | Reference |
| YES                                  | 4 (8.7)    | 33 (12.41)  | 1.487 (0.501 to 4.416)  | 0.4749    |
| Shock                                | NA         | 44 (95.65)  | 237 (89.1)              | Reference |
| YES                                  | 2 (4.35)   | 29 (10.9)   | 2.691 (0.62 to 11.686)  | 0.1864    |
| Skin abrasions                       | NA         | 44 (95.65)  | 241 (90.6)              | Reference |
| YES                                  | 2 (4.35)   | 25 (9.4)    | 2.282 (0.522 to 9.981)  | 0.2732    |
| Vascular injury                      | NA         | 41 (89.13)  | 225 (84.59)             | Reference |
| YES                                  | 5 (10.87)  | 41 (15.41)  | 1.494 (0.557 to 4.006)  | 0.4248    |
| Others                               | NA         | 45 (97.83)  | 249 (93.61)             | Reference |
| YES                                  | 1 (2.17)   | 17 (6.39)   | 3.069 (0.399 to 23.623) | 0.2815    |
| None                                 | NA         | 14 (30.43)  | 160 (56.77)             | Reference |
| YES                                  | 32 (69.57) | 106 (43.23) | 0.29 (0.148 to 0.569)   | 0.0003    |



**Supplemental Table 6.** Multivariate analysis of logistic regression was conducted to identify the relative risk factors for patients with polymicrobial positive (PP) or polymicrobial negative (PN) infections.

|                                      | Odds Ratio<br>(%95 CI) | P vaule |
|--------------------------------------|------------------------|---------|
| <b>5-Source of patients</b>          |                        |         |
| Primary admitted w/o surgery         | Reference              |         |
| Transferred w/o postoperative        | 2.648 (0.8 to 8.761)   | 0.1108  |
| Transferred postoperative            | 0.637 (0.22 to 1.839)  | 0.4039  |
| Return to follow-up postoperative    | 0.685 (0.108 to 4.341) | 0.6881  |
| <b>7-Complications/Comorbidities</b> |                        |         |
| None                                 | NA                     |         |
| YES                                  | 0.384 (0.189 to 0.78)  | 0.0082  |

**Supplemental Table 7.** Univariate analysis of logistic regression was conducted to identify the relative risk factors for patients with polymicrobial positive (PP) or polymicrobial positive/negative (PP+PN) infections.

|                                      | PP<br>N=46  | PP+PN<br>N=302 | Odds Ratio<br>(%95 CI)  | P value   |
|--------------------------------------|-------------|----------------|-------------------------|-----------|
| <b>1-Ethnicity</b>                   |             |                |                         |           |
| The Han ethnicity                    | 42 (91.3)   | 269 (89.07)    | Reference               |           |
| The Hui ethnicity                    | 0 (0)       | 19 (6.29)      | 4.119 (0.872 to +∞)     | 0.1417    |
| Tujia                                | 3 (6.52)    | 7 (2.32)       | 0.364 (0.091 to 1.464)  | 0.1548    |
| Other minorities                     | 1 (2.17)    | 7 (2.32)       | 1.093 (0.131 to 9.109)  | 0.9345    |
| <b>2-Gender</b>                      |             |                |                         |           |
| Male                                 | 259 (85.76) | 40 (86.96)     | Reference               |           |
| Female                               | 43 (14.24)  | 6 (13.04)      | 1.107 (0.443 to 2.768)  | 0.8282    |
| <b>3-Injury factors</b>              |             |                |                         |           |
| Traffic accident                     | 15 (32.61)  | 97 (32.12)     | Reference               |           |
| Fall                                 | 9 (19.57)   | 42 (13.91)     | 0.722 (0.293 to 1.779)  | 0.4785    |
| High falling injury                  | 5 (10.87)   | 36 (11.92)     | 1.113 (0.377 to 3.285)  | 0.8457    |
| Hard object crashing                 | 4 (8.7)     | 30 (9.93)      | 1.16 (0.358 to 3.761)   | 0.8049    |
| Crush injury                         | 0 (0)       | 13 (4.3)       | 4.524 (0.231 to 88.673) | 0.3202    |
| Destructive injury                   | 1 (2.17)    | 5 (1.66)       | 0.773 (0.084 to 7.082)  | 0.8199    |
| Mangled injury                       | 0 (0)       | 11 (3.64)      | 3.853 (0.191 to 77.656) | 0.3787    |
| Cutting injury                       | 0 (0)       | 3 (0.99)       | 1.173 (0.037 to 37.368) | 0.9281    |
| High-explosive injury                | 0 (0)       | 2 (0.66)       | 0.838 (0.02 to 35.814)  | 0.9264    |
| Pathological fracture                | 0 (0)       | 1 (0.33)       | 0.348 (0.005 to 23.589) | 0.6235    |
| Ambiguous trauma                     | 12 (26.09)  | 62 (20.53)     | 0.844 (0.374 to 1.902)  | 0.6818    |
| <b>4-Age</b>                         |             |                |                         |           |
| ≤ 20 yr                              | 4 (8.7)     | 46 (15.23)     | Reference               |           |
| 21-30 yr                             | 10 (21.74)  | 55 (18.21)     | 0.478 (0.141 to 1.626)  | 0.2375    |
| 31-40 yr                             | 6 (13.04)   | 61 (20.2)      | 0.884 (0.236 to 3.315)  | 0.8550    |
| 41-50 yr                             | 13 (28.26)  | 75 (24.83)     | 0.502 (0.154 to 1.631)  | 0.2516    |
| 51-60 yr                             | 9 (19.57)   | 43 (14.24)     | 0.415 (0.119 to 1.449)  | 0.1681    |
| ≥ 61 yr                              | 4 (8.7)     | 22 (7.28)      | 0.478 (0.109 to 2.093)  | 0.3274    |
| <b>5-Source of patients</b>          |             |                |                         |           |
| Primary admitted w/o surgery         | 5 (10.87)   | 38 (12.58)     | Reference               |           |
| Transferred w/o postoperative        | 8 (17.39)   | 123 (40.73)    | 2.023 (0.625 to 6.55)   | 0.2400    |
| Transferred postoperative            | 31 (67.39)  | 117 (38.74)    | 0.497 (0.18 to 1.368)   | 0.1756    |
| Return to follow-up postoperative    | 2 (4.35)    | 24 (7.95)      | 1.579 (0.283 to 8.796)  | 0.24      |
| <b>6-Injury types</b>                |             |                |                         |           |
| Closed                               | 4 (8.7)     | 47 (13.56)     | Reference               |           |
| Opened                               | 38 (82.61)  | 234 (77.48)    | 0.524 (0.179 to 1.538)  | 0.2396    |
| Ambiguous                            | 4 (8.7)     | 21 (6.95)      | 0.447 (0.102 to 1.959)  | 0.2855    |
| <b>7-Complications/Comorbidities</b> |             |                |                         |           |
| Anemia                               | NA          | 45 (97.83)     | 264 (87.42)             | Reference |
| YES                                  | 1 (2.17)    | 38 (12.58)     | 6.475 (0.867 to 48.34)  | 0.0686    |
| Diabetes                             | NA          | 45 (97.83)     | 292 (96.69)             | Reference |
| YES                                  | 1 (2.17)    | 10 (3.31)      | 1.541 (0.193 to 12.329) | 0.6835    |
| Hypertension                         | NA          | 46 (100)       | 296 (98.01)             | Reference |
| YES                                  | 0 (0)       | 6 (1.99)       | 1.722 (0.362 to +∞)     | 0.6209    |
| Hypoproteinemia                      | NA          | 43 (93.48)     | 275 (91.06)             | Reference |
| YES                                  | 3 (6.52)    | 27 (8.94)      | 1.407 (0.409 to 4.837)  | 0.5882    |
| Multiple fracture                    | NA          | 38 (82.61)     | 242 (80.13)             | Reference |
| YES                                  | 8 (17.39)   | 60 (19.87)     | 1.178 (0.522 to 2.656)  | 0.6934    |
| Nerve injury                         | NA          | 42 (91.3)      | 284 (94.04)             | Reference |
| YES                                  | 4 (8.7)     | 18 (5.96)      | 0.665 (0.215 to 2.062)  | 0.4803    |
| Shock                                | NA          | 44 (95.65)     | 286 (94.7)              | Reference |
| YES                                  | 2 (4.35)    | 16 (5.3)       | 1.231 (0.274 to 5.537)  | 0.7868    |
| Skin abrasions                       | NA          | 44 (95.65)     | 281 (93.05)             | Reference |
| YES                                  | 2 (4.35)    | 21 (6.95)      | 1.644 (0.372 to 7.257)  | 0.5116    |
| Vascular injury                      | NA          | 41 (89.13)     | 272 (90.07)             | Reference |
| YES                                  | 5 (10.87)   | 30 (9.93)      | 0.904 (0.332 to 2.464)  | 0.8442    |
| Others                               | NA          | 45 (97.83)     | 279 (92.38)             | Reference |
| YES                                  | 1 (2.17)    | 23 (7.62)      | 3.71 (0.489 to 28.153)  | 0.2049    |
| None                                 | NA          | 14 (30.43)     | 136 (42.72)             | Reference |
| YES                                  | 32 (69.57)  | 166 (57.28)    | 0.534 (0.274 to 1.041)  | 0.0655    |

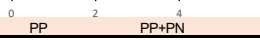

**Supplemental Table 8.** Multivariate logistic regression analysis was conducted to identify the relative risk factors for patients with polymicrobial positive (PP) or polymicrobial positive/negative (PP+PN) infections.

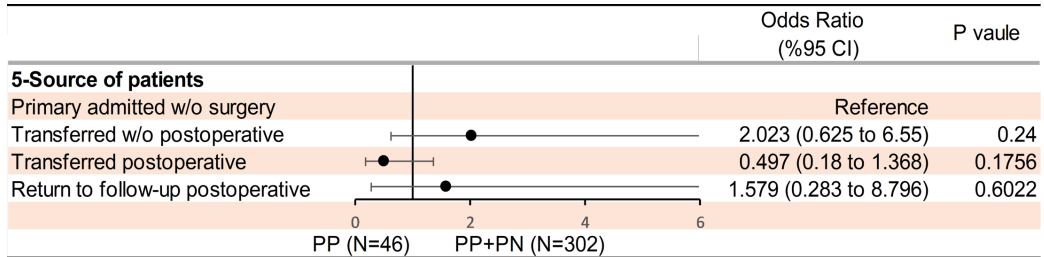

**Supplemental Table 9.** Univariate analysis of logistic regression was conducted to identify the relative risk factors for patients with polymicrobial negative (PN) or polymicrobial positive/negative infection (PP+PN).

|                                      | PN<br>N=266 | PP+PN<br>N=302 |  | Odds Ratio<br>(%95 CI)   | P value |
|--------------------------------------|-------------|----------------|--|--------------------------|---------|
| <b>1-Ethnicity</b>                   |             |                |  |                          |         |
| The Han ethnicity                    | 251 (94.36) | 269 (89.07)    |  | Reference                |         |
| The Hui ethnicity                    | 3 (1.13)    | 19 (6.29)      |  | 5.815 (1.701 to 19.883)  | 0.005   |
| Tujia                                | 2 (0.75)    | 7 (2.32)       |  | 3.216 (0.662 to 15.626)  | 0.1476  |
| Other minorities                     | 10 (3.76)   | 7 (2.32)       |  | 0.643 (0.241 to 1.716)   | 0.3779  |
| <b>2-Gender</b>                      |             |                |  |                          |         |
| Male                                 | 259 (85.76) | 208 (78.2)     |  | Reference                |         |
| Female                               | 43 (14.24)  | 58 (21.8)      |  | 0.595 (0.386 to 0.919)   | 0.0194  |
| <b>3-Injury factors</b>              |             |                |  |                          |         |
| Traffic accident                     | 119 (44.74) | 97 (32.12)     |  | Reference                |         |
| Fall                                 | 23 (8.65)   | 42 (13.91)     |  | 2.24 (1.261 to 3.98)     | 0.0060  |
| High falling injury                  | 21 (7.89)   | 30 (9.93)      |  | 1.753 (0.944 to 3.254)   | 0.0755  |
| Hard object crashing                 | 32 (12.03)  | 36 (11.92)     |  | 1.38 (0.799 to 2.384)    | 0.2479  |
| Crush injury                         | 8 (3.01)    | 13 (4.3)       |  | 1.94 (0.773 to 4.872)    | 0.1583  |
| Destructive injury                   | 11 (4.14)   | 5 (1.66)       |  | 0.558 (0.187 to 1.66)    | 0.2939  |
| Mangled injury                       | 11 (4.14)   | 11 (3.64)      |  | 1.227 (0.51 to 2.951)    | 0.6480  |
| Cutting injury                       | 4 (1.5)     | 3 (0.99)       |  | 0.895 (0.196 to 4.23)    | 0.9229  |
| High-explosive injury                | 3 (1.13)    | 2 (0.66)       |  | 0.818 (0.134 to 4.993)   | 0.8276  |
| Pathological fracture                | 0 (0)       | 1 (0.33)       |  | 3.678 (0.038 to 353.548) | 0.5761  |
| Ambiguous trauma                     | 34 (12.78)  | 62 (20.53)     |  | 2.177 (1.324 to 3.579)   | 0.0022  |
| <b>4-Age</b>                         |             |                |  |                          |         |
| ≤ 20 yr                              | 33 (12.41)  | 46 (15.23)     |  | Reference                |         |
| 21-30 yr                             | 40 (15.04)  | 55 (18.21)     |  | 0.986 (0.539 to 1.806)   | 0.9646  |
| 31-40 yr                             | 33 (12.41)  | 61 (20.2)      |  | 1.326 (0.716 to 2.455)   | 0.3692  |
| 41-50 yr                             | 89 (33.46)  | 75 (24.83)     |  | 0.605 (0.351 to 1.04)    | 0.0690  |
| 51-60 yr                             | 40 (15.04)  | 43 (14.24)     |  | 0.771 (0.415 to 1.435)   | 0.4120  |
| ≥ 61 yr                              | 31 (11.65)  | 22 (7.28)      |  | 0.509 (0.251 to 1.031)   | 0.0609  |
| <b>5-Source of patients</b>          |             |                |  |                          |         |
| Primary admitted w/o surgery         | 32 (12.03)  | 38 (12.58)     |  | Reference                |         |
| Transferred w/o postoperative        | 130 (48.87) | 123 (40.73)    |  | 0.797 (0.469 to 1.355)   | 0.4016  |
| Transferred postoperative            | 96 (36.09)  | 117 (38.74)    |  | 1.026 (0.597 to 1.765)   | 0.9252  |
| Return to follow-up postoperative    | 8 (3.01)    | 24 (7.95)      |  | 2.526 (0.999 to 6.391)   | 0.0503  |
| <b>6-Injury types</b>                |             |                |  |                          |         |
| Closed                               | 24 (9.02)   | 47 (13.56)     |  | Reference                |         |
| Opened                               | 232 (87.22) | 234 (77.48)    |  | 0.515 (0.305 to 0.87)    | 0.0131  |
| Ambiguous                            | 10 (3.76)   | 21 (6.95)      |  | 1.072 (0.436 to 2.636)   | 0.8792  |
| <b>7-Complications/Comorbidities</b> |             |                |  |                          |         |
| Anemia                               | NA          | 244 (87.42)    |  | Reference                |         |
| YES                                  | 22 (8.27)   | 38 (12.58)     |  | 1.596 (0.918 to 2.776)   | 0.0975  |
| Diabetes                             | NA          | 261 (96.69)    |  | Reference                |         |
| YES                                  | 5 (1.88)    | 10 (3.31)      |  | 1.788 (0.603 to 5.297)   | 0.2947  |
| Hypertension                         | NA          | 256 (98.01)    |  | Reference                |         |
| YES                                  | 10 (3.76)   | 6 (1.99)       |  | 0.519 (0.186 to 1.448)   | 0.2101  |
| Hypoproteinemia                      | NA          | 227 (85.34)    |  | Reference                |         |
| YES                                  | 39 (14.66)  | 27 (8.94)      |  | 0.571 (0.339 to 0.962)   | 0.0354  |
| Multiple fracture                    | NA          | 175 (65.79)    |  | Reference                |         |
| YES                                  | 91 (34.21)  | 60 (19.87)     |  | 0.477 (0.326 to 0.697)   | 0.0001  |
| Nerve injury                         | NA          | 233 (87.59)    |  | Reference                |         |
| YES                                  | 33 (12.41)  | 18 (5.96)      |  | 0.448 (0.246 to 0.815)   | 0.0086  |
| Shock                                | NA          | 237 (89.1)     |  | Reference                |         |
| YES                                  | 29 (10.9)   | 16 (5.3)       |  | 0.457 (0.242 to 0.862)   | 0.0156  |
| Skin abrasions                       | NA          | 241 (90.6)     |  | Reference                |         |
| YES                                  | 25 (9.4)    | 21 (6.95)      |  | 0.72 (0.393 to 1.319)    | 0.2882  |
| Vascular injury                      | NA          | 225 (84.59)    |  | Reference                |         |
| YES                                  | 41 (15.41)  | 30 (9.93)      |  | 0.605 (0.366 to 1.001)   | 0.0504  |
| Others                               | NA          | 249 (92.38)    |  | Reference                |         |
| YES                                  | 17 (6.39)   | 23 (7.62)      |  | 1.207 (0.631 to 2.312)   | 0.5696  |
| None                                 | NA          | 160 (60.15)    |  | Reference                |         |
| YES                                  | 106 (39.85) | 166 (57.28)    |  | 1.842 (1.319 to 2.573)   | 0.0003  |

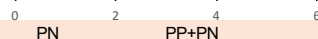

**Supplemental Table 10.** Multivariate analysis of logistic regression was conducted to identify the relative risk factors for patients with polymicrobial negative (PN) or polymicrobial positive/negative (PP+PN) infections.

|                                    | Odds Ratio<br>(%95 CI)  | P value                |
|------------------------------------|-------------------------|------------------------|
| <b>Ethnicity</b>                   |                         |                        |
| The Han ethnicity                  | Reference               |                        |
| The Hui ethnicity                  | 4.704 (1.312 to 16.87)  | 0.0175                 |
| Tujia                              | 3.368 (0.643 to 17.648) | 0.1506                 |
| Other minorities                   | 0.629 (0.226 to 1.75)   | 0.3746                 |
| <b>Gender</b>                      |                         |                        |
| Male                               | Reference               |                        |
| Female                             | 1.573 (0.745 to 3.32)   | 0.0803                 |
| <b>Age</b>                         |                         |                        |
| ≤ 20 yr                            | Reference               |                        |
| 21-30 yr                           | 1.424 (0.746 to 2.719)  | 0.2841                 |
| 31-40 yr                           | 1.738 (0.899 to 3.359)  | 0.1002                 |
| 41-50 yr                           | 0.728 (0.407 to 1.302)  | 0.2841                 |
| 51-60 yr                           | 0.863 (0.444 to 1.675)  | 0.6627                 |
| ≥ 61 yr                            | 0.636 (0.301 to 1.341)  | 0.2344                 |
| <b>Source of patients</b>          |                         |                        |
| Primary admitted w/o surgery       | Reference               |                        |
| Transferred w/o postoperative      | 0.655 (0.371 to 1.155)  | 0.1439                 |
| Transferred postoperative          | 0.815 (0.456 to 1.455)  | 0.4887                 |
| Return to follow-up postoperative  | 2.256 (0.857 to 5.941)  | 0.0994                 |
| <b>Complications/Comorbidities</b> |                         |                        |
| Anemia                             | NA                      | Reference              |
|                                    | YES                     | 1.66 (0.915 to 3.009)  |
| Multiple fracture                  | NA                      | Reference              |
|                                    | YES                     | 0.528 (0.351 to 0.796) |
| Nerve injury                       | NA                      | Reference              |
|                                    | YES                     | 0.529 (0.28 to 0.997)  |
| Shock                              | NA                      | Reference              |
|                                    | YES                     | 0.537 (0.274 to 1.051) |

PN (N=266)      PP+PN (N=302)
